# Supplementary material for: Covalent CDK7 Inhibitor THZ1 Inhibits Myogenic Differentiation
Source: PubMed Central journal article supplement — J Cancer. 2018 Aug 6;9(17):3149–55. doi: 10.7150/jca.25395 (PMC6134829; doi:10.7150/jca.25395), 2018-08-06

**Supplementary figure.1 THZ1 induced apoptosis and inhibits proliferation of MC38 cancer cells as well as E14 cells and 661w cells.** (A)(B)MC38 cells were treated with gradient concentration of THZ1 (0, 50, 100, 200, 400, 800 nM) for 24h. The percentage of live and apoptosis cells were measured on flow cytometry. Independent experiment was repeated for three times. Bar graph is for quantification of figure 1B. (C)(D) E14 cells were treated with gradient concentration of THZ1 (0,50, 100, 200, 400, 800 nM) for 24 h. The percentage of live and apoptosis cells were measured on flow cytometry. Independent experiment was repeated for three times. Bar graph is for quantification of figure 1D. (E)(F) E14 cells were treated with gradient concentration of THZ1 (0, 50, 100, 200, 400, 800 nM) for 24h. The percentage of live and apoptosis cells were measured on flow cytometry. Independent experiment was repeated for three times. Bar graph is for quantification of figure 1F. (G) OD values in MTT assay were measured after CT26 cells were treated with gradient concentration of THZ1 (0, 50, 100, 200, 400, 800 nM) for 24 h, 48 h, 72 h respectively.

# Supplementary Figure 1

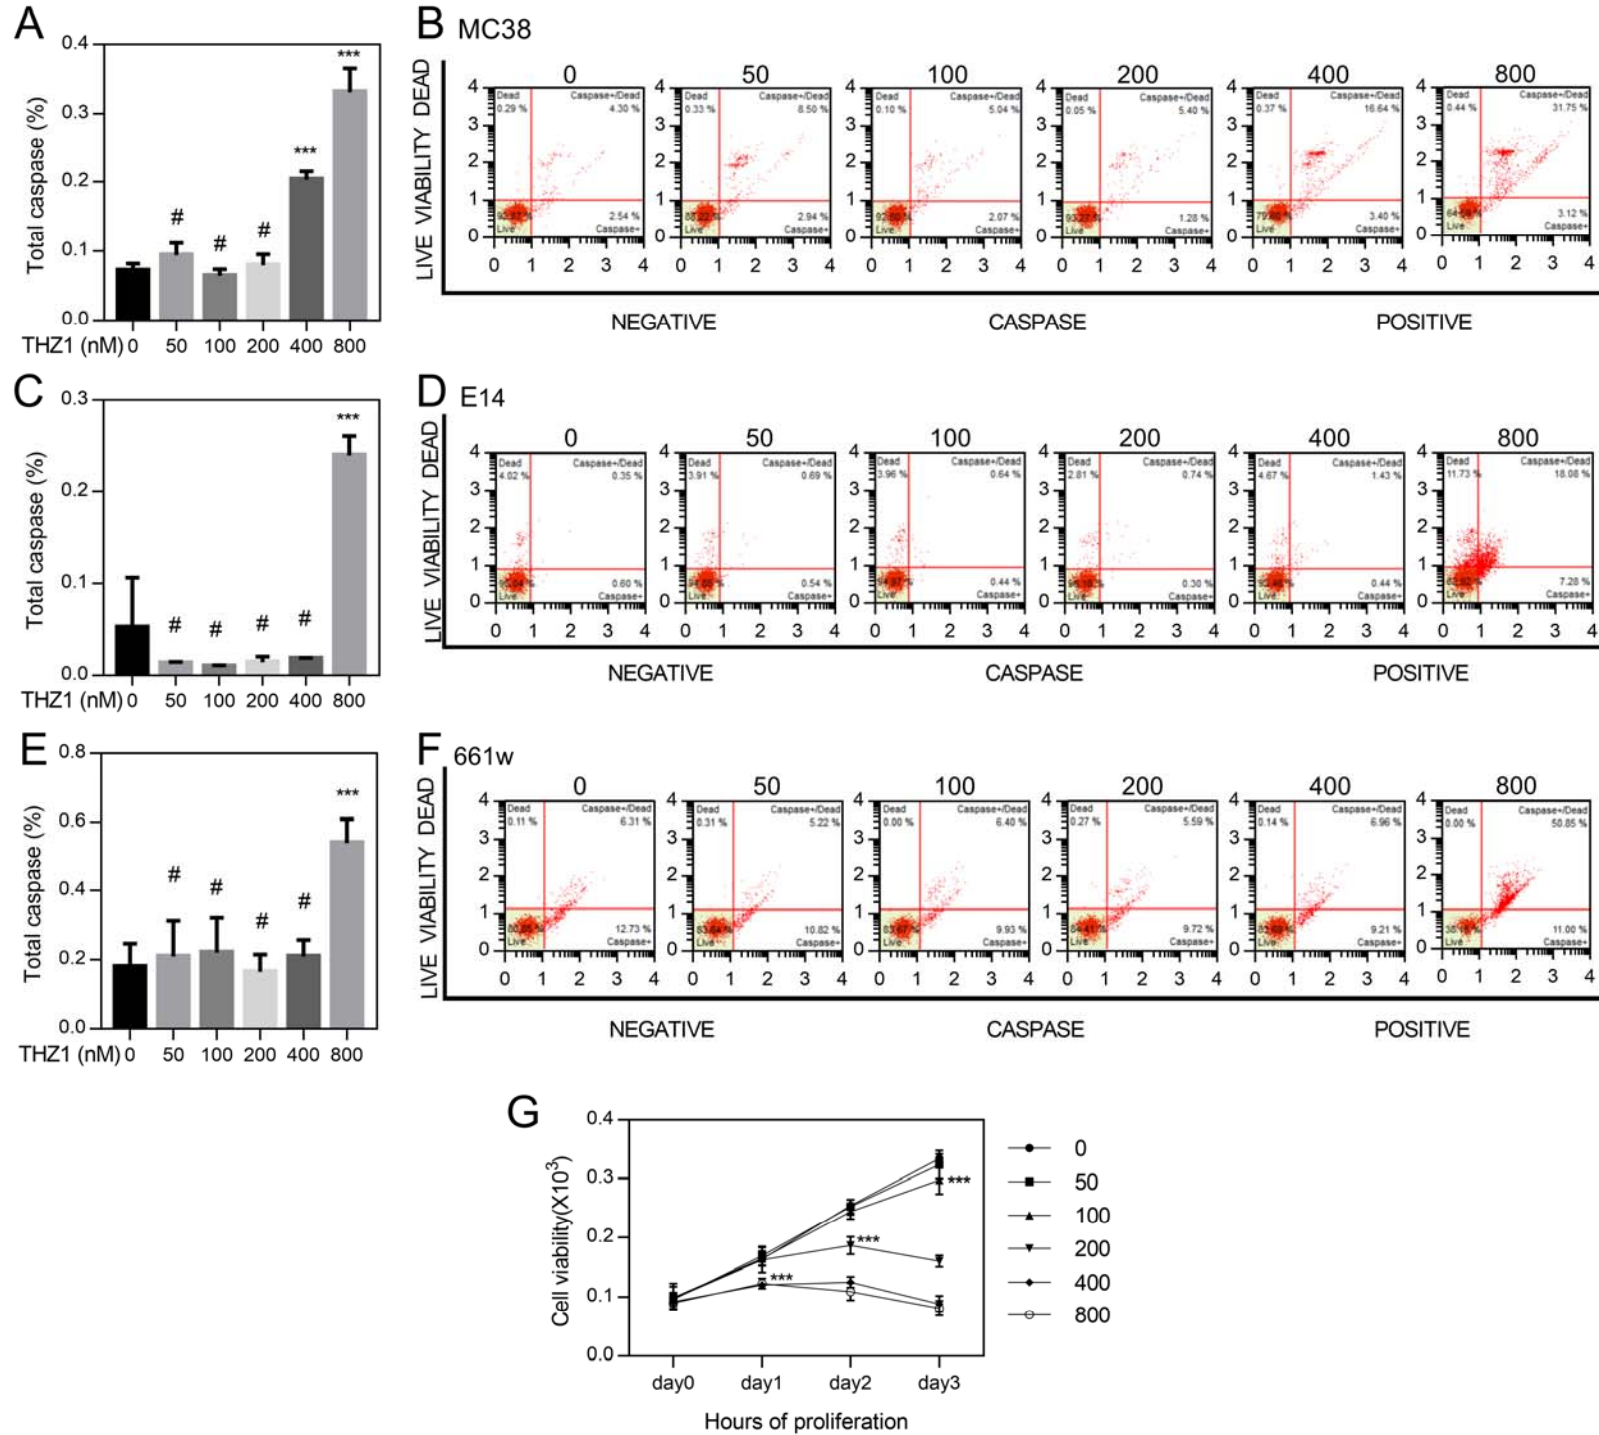

Supplement: jcav09p3149s1.pdf [file jcav09p3149s1.pdf]
